# Supplementary material for: The Italian public health response during the pandemic emergency: from qualitative data to the “performance index” of care provided by Spoleto Hospital
Source: Front Public Health. 2025 Jun 16;13:1337375. doi: 10.3389/fpubh.2025.1337375 (PMC12206721; doi:10.3389/fpubh.2025.1337375)
Supplement: Supplementary file 5 [file Table_1.xlsx]

## Sheet: Supplementary Table 1
Supplementary Table 1 - Results related to items for OA1, based on the conversion scale.
			OA/OU	Inpatient Units
				General Medicine				Onco-hematology				General Surgery				Obstetrics and Gynecology				Ophthalmology				Orthopaedic-Traumatology				Reanimation
# SECTION	SECTION	# ITEM	ITEM (query)	Mean	Classification scale	Priority Score	Category	Mean	Classification scale	Priority Score	Category	Mean	Classification scale	Priority Score	Category	Mean	Classification scale	Priority Score	Category	Mean	Classification scale	Priority Score	Category	Mean	Classification scale	Priority Score	Category	Mean	Classification scale	Priority Score	Category
1	Context Analysis		Did the amount of medical procedures increase?
		1	During the first wave	1	3	3	Strong Weakness	0	1	5	Strong Weakness	3	8	1.5	Strength	1	3	3	Strong Weakness	1	3	3	Strong Weakness	1	3	3	Strong Weakness	4	10	4.5	Strength
		2	During the second wave	4	10	4.5	Strength	0	1	5	Strong Weakness	0	1	5	Strong Weakness	1	3	3	Strong Weakness	1	3	3	Strong Weakness	1	3	3	Strong Weakness	4	10	4.5	Strength
		3	During the third wave	4	10	4.5	Strength	0	1	5	Strong Weakness	0	1	5	Strong Weakness	1	3	3	Strong Weakness	1	3	3	Strong Weakness	1	3	3	Strong Weakness	4	10	4.5	Strength
		4	During the fourth wave	4	10	4.5	Strength	4	10	4.5	Strength	2	5	1.5	Faint Weakness	2	5	1.5	Faint Weakness	2	5	1.5	Faint Weakness	1	3	3	Strong Weakness	1	3	3	Strong Weakness
		5	During the fifth wave	2	5	1.5	Faint Weakness	4	10	4.5	Strength	2	5	1.5	Faint Weakness	2	5	1.5	Faint Weakness	2	5	1.5	Faint Weakness	1	3	3	Strong Weakness	1	3	3	Strong Weakness
			SECTION 1 MEAN SCORE	3	8	1.5	Strength	1.6	4	2	Strong Weakness	1.4	4	2	Strong Weakness	1.4	4	2	Strong Weakness	1.4	4	2	Strong Weakness	1	3	3	Strong Weakness	2.8	7	0.5	Faint Weakness
2	Patient Access to the hospital		Were safety protocols adopted?
		6	During the first wave	1	3	3	Strong Weakness	4	10	4.5	Strength	4	10	4.5	Strength	4	10	4.5	Strength	4	10	4.5	Strength	4	10	4.5	Strength	4	10	4.5	Strength
		7	During the second wave	4	10	4.5	Strength	4	10	4.5	Strength	4	10	4.5	Strength	4	10	4.5	Strength	4	10	4.5	Strength	4	10	4.5	Strength	4	10	4.5	Strength
		8	During the third wave	4	10	4.5	Strength	4	10	4.5	Strength	4	10	4.5	Strength	4	10	4.5	Strength	4	10	4.5	Strength	4	10	4.5	Strength	4	10	4.5	Strength
		9	During the fourth wave	3	8	1.5	Strength	4	10	4.5	Strength	4	10	4.5	Strength	4	10	4.5	Strength	4	10	4.5	Strength	4	10	4.5	Strength	4	10	4.5	Strength
		10	During the fifth wave	3	8	1.5	Strength	4	10	4.5	Strength	4	10	4.5	Strength	4	10	4.5	Strength	3	8	1.5	Strength	4	10	4.5	Strength	4	10	4.5	Strength
			Were social distancing measures taken?
		11	During the first wave	1	3	3	Strong Weakness	4	10	4.5	Strength	4	10	4.5	Strength	4	10	4.5	Strength	4	10	4.5	Strength	4	10	4.5	Strength	4	10	4.5	Strength
		12	During the second wave	4	10	4.5	Strength	4	10	4.5	Strength	4	10	4.5	Strength	4	10	4.5	Strength	4	10	4.5	Strength	4	10	4.5	Strength	4	10	4.5	Strength
		13	During the third wave	4	10	4.5	Strength	4	10	4.5	Strength	4	10	4.5	Strength	4	10	4.5	Strength	4	10	4.5	Strength	4	10	4.5	Strength	4	10	4.5	Strength
		14	During the fourth wave	2	5	1.5	Faint Weakness	4	10	4.5	Strength	4	10	4.5	Strength	4	10	4.5	Strength	4	10	4.5	Strength	4	10	4.5	Strength	3	8	1.5	Strength
		15	During the fifth wave	1	3	3	Strong Weakness	4	10	4.5	Strength	4	10	4.5	Strength	4	10	4.5	Strength	4	10	4.5	Strength	4	10	4.5	Strength	2	5	1.5	Faint Weakness
			SECTION 2 MEAN SCORE	2.7	7	0.5	Faint Weakness	4	10	4.5	Strength	4	10	4.5	Strength	4	10	4.5	Strength	4	10	4.5	Strength	4	10	4.5	Strength	3.4	9	3	Strength
3	Impact on taking charge of NON-COVID-19 patients		During the first two waves, considered as the most critical for adjustment, related to NON-COVID-19 patients:
		16	Have canceled visits been rescheduled and retrieved?	4	10	4.5	Strength	4	10	4.5	Strength	3	8	1.5	Strength	4	10	4.5	Strength	3	8	1.5	Strength	4	10	4.5	Strength	3	8	1.5	Strength
		17	Have remote clinical services been activated for patients who cannot interrupt their treatment (telemedicine)?	1	3	3	Strong Weakness	4	10	4.5	Strength	0	1	5	Strong Weakness	3	8	1.5	Strength	0	1	5	Strong Weakness	3	8	1.5	Strength	2	5	1.5	Faint Weakness
			SECTION 3 MEAN SCORE	2.5	6	1	Faint Weakness	4	10	4.5	Strength	1.5	4	2	Strong Weakness	3.5	9	3	Strength	1.5	4	2	Strong Weakness	3.5	9	3	Strength	2.5	6	1	Faint Weakness
4	Impact on taking charge of COVID-19 patients		Did you treat COVID-19 patients?
		18	During the first wave	2	5	1.5	Faint Weakness	0	1	5	Strong Weakness	1	3	3	Strong Weakness	1	3	3	Strong Weakness	1	3	3	Strong Weakness	1	3	3	Strong Weakness	2	5	1.5	Faint Weakness
		19	During the second wave	4	10	4.5	Strength	0	1	5	Strong Weakness	2	5	1.5	Faint Weakness	1	3	3	Strong Weakness	1	3	3	Strong Weakness	1	3	3	Strong Weakness	4	10	4.5	Strength
		20	During the third wave	1	3	3	Strong Weakness	0	1	5	Strong Weakness	2	5	1.5	Faint Weakness	1	3	3	Strong Weakness	1	3	3	Strong Weakness	1	3	3	Strong Weakness	4	10	4.5	Strength
		21	During the fourth wave	2	5	1.5	Faint Weakness	0	1	5	Strong Weakness	1	3	3	Strong Weakness	1	3	3	Strong Weakness	1	3	3	Strong Weakness	1	3	3	Strong Weakness	2	5	1.5	Faint Weakness
		22	During the fifth wave	2	5	1.5	Faint Weakness	0	1	5	Strong Weakness	1	3	3	Strong Weakness	1	3	3	Strong Weakness	1	3	3	Strong Weakness	1	3	3	Strong Weakness	2	5	1.5	Faint Weakness
			Have clinical pathways for COVID-19 and NON-COVID-19 patients been separated?
		23	During the first wave	1	3	3	Strong Weakness	4	10	4.5	Strength	4	10	4.5	Strength	0	1	5	Strong Weakness	4	10	4.5	Strength	4	10	4.5	Strength	4	10	4.5	Strength
		24	During the second wave	4	10	4.5	Strength	4	10	4.5	Strength	4	10	4.5	Strength	0	1	5	Strong Weakness	4	10	4.5	Strength	4	10	4.5	Strength	4	10	4.5	Strength
		25	During the third wave	2	5	1.5	Faint Weakness	4	10	4.5	Strength	4	10	4.5	Strength	0	1	5	Strong Weakness	4	10	4.5	Strength	4	10	4.5	Strength	4	10	4.5	Strength
		26	During the fourth wave	4	10	4.5	Strength	4	10	4.5	Strength	4	10	4.5	Strength	0	1	5	Strong Weakness	4	10	4.5	Strength	2	5	1.5	Faint Weakness	4	10	4.5	Strength
		27	During the fifth wave	4	10	4.5	Strength	4	10	4.5	Strength	3	8	1.5	Strength	0	1	5	Strong Weakness	4	10	4.5	Strength	2	5	1.5	Faint Weakness	4	10	4.5	Strength
			SECTION 4 MEAN SCORE	2.6	6	1	Faint Weakness	2	5	1.5	Faint Weakness	2.6	6	1	Faint Weakness	0.5	2	4	Strong Weakness	2.5	6	1	Faint Weakness	2.1	5	1.5	Faint Weakness	3.4	9	3	Strength
5	Impact on patient management		Was the continuity of care ensured for NON-COVID-19 patients?
		28	During the first wave	4	10	4.5	Strength	4	10	4.5	Strength	4	10	4.5	Strength	0	1	5	Strong Weakness	4	10	4.5	Strength	1	3	3	Strong Weakness	4	10	4.5	Strength
		29	During the second wave	1	3	3	Strong Weakness	4	10	4.5	Strength	1	3	3	Strong Weakness	0	1	5	Strong Weakness	4	10	4.5	Strength	1	3	3	Strong Weakness	1	3	3	Strong Weakness
		30	During the third wave	4	10	4.5	Strength	4	10	4.5	Strength	1	3	3	Strong Weakness	0	1	5	Strong Weakness	4	10	4.5	Strength	2	5	1.5	Faint Weakness	1	3	3	Strong Weakness
		31	During the fourth wave	4	10	4.5	Strength	4	10	4.5	Strength	2	5	1.5	Faint Weakness	0	1	5	Strong Weakness	4	10	4.5	Strength	3	8	1.5	Strength	3	8	1.5	Strength
		32	During the fifth wave	4	10	4.5	Strength	4	10	4.5	Strength	2	5	1.5	Faint Weakness	0	1	5	Strong Weakness	4	10	4.5	Strength	3	8	1.5	Strength	4	10	4.5	Strength
			Was the continuity of care ensured for COVID-19 patients?
		33	During the first wave	1	3	3	Strong Weakness	0	1	5	Strong Weakness	1	3	3	Strong Weakness	0	1	5	Strong Weakness	0	1	5	Strong Weakness	0	1	5	Strong Weakness	1	3	3	Strong Weakness
		34	During the second wave	4	10	4.5	Strength	0	1	5	Strong Weakness	1	3	3	Strong Weakness	0	1	5	Strong Weakness	0	1	5	Strong Weakness	0	1	5	Strong Weakness	4	10	4.5	Strength
		35	During the third wave	4	10	4.5	Strength	0	1	5	Strong Weakness	1	3	3	Strong Weakness	0	1	5	Strong Weakness	0	1	5	Strong Weakness	0	1	5	Strong Weakness	4	10	4.5	Strength
		36	During the fourth wave	4	10	4.5	Strength	0	1	5	Strong Weakness	1	3	3	Strong Weakness	0	1	5	Strong Weakness	0	1	5	Strong Weakness	0	1	5	Strong Weakness	1	3	3	Strong Weakness
		37	During the fifth wave	4	10	4.5	Strength	0	1	5	Strong Weakness	1	3	3	Strong Weakness	0	1	5	Strong Weakness	0	1	5	Strong Weakness	0	1	5	Strong Weakness	1	3	3	Strong Weakness
			SECTION 5 MEAN SCORE	3.4	9	3	Strength	2	5	1.5	Faint Weakness	1.5	4	2	Strong Weakness	0	1	5	Strong Weakness	2	5	1.5	Faint Weakness	1	3	3	Strong Weakness	2.4	6	1	Faint Weakness
6	Experience as COVID-19 referral center		During the second wave, Spoleto Hospital became COVID-19 referrel center:
		38	In your opinion, was it the most complex pandemic phase?	4	10	4.5	Strength	4	10	4.5	Strength	4	10	4.5	Strength	2	5	1.5	Faint Weakness	3	8	1.5	Strength	4	10	4.5	Strength	4	10	4.5	Strength
		39	Were all medical procedures guaranteed despite the closure of some clinical wards?	1	3	3	Strong Weakness	2	5	1.5	Faint Weakness	1	3	3	Strong Weakness	2	5	1.5	Faint Weakness	4	10	4.5	Strength	1	3	3	Strong Weakness	1	3	3	Strong Weakness
		40	Did the closure of some clinical wards create inconvenience to users?	4	10	4.5	Strength	4	10	4.5	Strength	4	10	4.5	Strength	4	10	4.5	Strength	3	8	1.5	Strength	4	10	4.5	Strength	4	10	4.5	Strength
		41	Has the timing been respected in the passage of the patient from one care setting to another within the Hospital?	2	5	1.5	Faint Weakness	3	8	1.5	Strength	3	8	1.5	Strength	2	5	1.5	Faint Weakness	4	10	4.5	Strength	3	8	1.5	Strength	4	10	4.5	Strength
		42	Were multidisciplinary discussions on the health status of patients carried out?	1	3	3	Strong Weakness	4	10	4.5	Strength	2	5	1.5	Faint Weakness	1	3	3	Strong Weakness	3	8	1.5	Strength	0	1	5	Strong Weakness	2	5	1.5	Faint Weakness
		43	Have structural and organizational changes been made in your medical facility?	3	8	1.5	Strength	4	10	4.5	Strength	4	10	4.5	Strength	4	10	4.5	Strength	3	8	1.5	Strength	4	10	4.5	Strength	4	10	4.5	Strength
			SECTION 6 MEAN SCORE	2.5	6	1	Faint Weakness	3.5	9	3	Strength	3	8	1.5	Strength	2.5	6	1	Faint Weakness	3.33333	8	1.5	Strength	2.66667	7	0.5	Faint Weakness	3.16667	8	1.5	Strength
7	Procedures and recommendations for healthcare personnel/users		Was the proper use of PPE monitored in patients and their families?
		44	During the first wave	1	3	3	Strong Weakness	4	10	4.5	Strength	0	1	5	Strong Weakness	4	10	4.5	Strength	1.04909	3	3	Strong Weakness	2.23077	6	1	Faint Weakness	29	10	4.5	Strength
		45	During the second wave	4	10	4.5	Strength	4	10	4.5	Strength	2	5	1.5	Faint Weakness	1	3	3	Strong Weakness	1.16369	3	3	Strong Weakness	2.75	7	0.5	Faint Weakness	33	10	4.5	Strength
		46	During the third wave	4	10	4.5	Strength	4	10	4.5	Strength	2	5	1.5	Faint Weakness	1	3	3	Strong Weakness	1.21626	3	3	Strong Weakness	2.46154	6	1	Faint Weakness	32	10	4.5	Strength
		47	During the fourth wave	4	10	4.5	Strength	4	10	4.5	Strength	0	1	5	Strong Weakness	0	1	5	Strong Weakness	0	1	5	Strong Weakness	0	1	5	Strong Weakness	0	1	5	Strong Weakness
		48	During the fifth wave	4	10	4.5	Strength	4	10	4.5	Strength	4	10	4.5	Strength	4	10	4.5	Strength	0.73782	2	4	Strong Weakness	3.61538	9	3	Strength	47	10	4.5	Strength
			Were the procedures/recommendations made clear and visible and respected?
		49	During the first wave	1	3	3	Strong Weakness	4	10	4.5	Strength	3	8	1.5	Strength	4	10	4.5	Strength	4	10	4.5	Strength	4	10	4.5	Strength	4	10	4.5	Strength
		50	During the second wave	4	10	4.5	Strength	4	10	4.5	Strength	4	10	4.5	Strength	4	10	4.5	Strength	4	10	4.5	Strength	4	10	4.5	Strength	4	10	4.5	Strength
		51	During the third wave	3	8	1.5	Strength	4	10	4.5	Strength	4	10	4.5	Strength	4	10	4.5	Strength	4	10	4.5	Strength	4	10	4.5	Strength	4	10	4.5	Strength
		52	During the fourth wave	3	8	1.5	Strength	4	10	4.5	Strength	3	8	1.5	Strength	4	10	4.5	Strength	4	10	4.5	Strength	4	10	4.5	Strength	4	10	4.5	Strength
		53	During the fifth wave	3	8	1.5	Strength	4	10	4.5	Strength	3	8	1.5	Strength	4	10	4.5	Strength	4	10	4.5	Strength	4	10	4.5	Strength	4	10	4.5	Strength
			SECTION 7 MEAN SCORE	3.1	8	1.5	Strength	4	10	4.5	Strength	2.5	6	1	Faint Weakness	3	8	1.5	Strength	2.41669	6	1	Faint Weakness	3.10577	8	1.5	Strength	16.1	10	4.5	Strength
8	Education-Information-Training: healthcare professionals’ management		Have healthcare workers been educated and trained on PPE dressing/dusting procedurs?
		54	During the first wave	1	3	3	Strong Weakness	4	10	4.5	Strength	2	5	1.5	Faint Weakness	4	10	4.5	Strength	4	10	4.5	Strength	3	8	1.5	Strength	2	5	1.5	Faint Weakness
		55	During the second wave	3	8	1.5	Strength	4	10	4.5	Strength	3	8	1.5	Strength	4	10	4.5	Strength	4	10	4.5	Strength	3	8	1.5	Strength	4	10	4.5	Strength
		56	During the third wave	2	5	1.5	Faint Weakness	4	10	4.5	Strength	2	5	1.5	Faint Weakness	4	10	4.5	Strength	4	10	4.5	Strength	1	3	3	Strong Weakness	4	10	4.5	Strength
		57	During the fourth wave	2	5	1.5	Faint Weakness	4	10	4.5	Strength	2	5	1.5	Faint Weakness	4	10	4.5	Strength	4	10	4.5	Strength	1	3	3	Strong Weakness	4	10	4.5	Strength
		58	During the fifth wave	2	5	1.5	Faint Weakness	4	10	4.5	Strength	2	5	1.5	Faint Weakness	4	10	4.5	Strength	4	10	4.5	Strength	1	3	3	Strong Weakness	4	10	4.5	Strength
			Was the staff equipped with different types of PPE in accordance with the professional exposure risk?
		59	During the first wave	1	3	3	Strong Weakness	4	10	4.5	Strength	2	5	1.5	Faint Weakness	2	5	1.5	Faint Weakness	3	8	1.5	Strength	0	1	5	Strong Weakness	2	5	1.5	Faint Weakness
		60	During the second wave	4	10	4.5	Strength	4	10	4.5	Strength	4	10	4.5	Strength	4	10	4.5	Strength	3	8	1.5	Strength	0	1	5	Strong Weakness	3	8	1.5	Strength
		61	During the third wave	3	8	1.5	Strength	4	10	4.5	Strength	3	8	1.5	Strength	4	10	4.5	Strength	3	8	1.5	Strength	0	1	5	Strong Weakness	3	8	1.5	Strength
		62	During the fourth wave	3	8	1.5	Strength	4	10	4.5	Strength	3	8	1.5	Strength	4	10	4.5	Strength	3	8	1.5	Strength	0	1	5	Strong Weakness	2	5	1.5	Faint Weakness
		63	During the fifth wave	3	8	1.5	Strength	4	10	4.5	Strength	3	8	1.5	Strength	4	10	4.5	Strength	3	8	1.5	Strength	0	1	5	Strong Weakness	2	5	1.5	Faint Weakness
			SECTION 8 MEAN SCORE	2.4	6	1	Faint Weakness	4	10	4.5	Strength	2.6	6	1	Faint Weakness	3.8	10	4.5	Strength	3.5	9	3	Strength	0.9	3	3	Strong Weakness	3	8	1.5	Strength
9	Analysis of factors internal to organization	64	When Spoleto Hospital became COVID-19 referrel center, were healthcare workers periodically tested for COVID-19 by nasopharyngeal swab?	4	10	4.5	Strength	4	10	4.5	Strength	4	10	4.5	Strength	4	10	4.5	Strength	4	10	4.5	Strength	4	10	4.5	Strength	4	10	4.5	Strength
		65	When Spoleto Hospital became COVID-19 referrel center, did the fear of contagion between staff/patients increase?	4	10	4.5	Strength	4	10	4.5	Strength	3	8	1.5	Strength	4	10	4.5	Strength	3	8	1.5	Strength	4	10	4.5	Strength	4	10	4.5	Strength
		66	Has the working time been adequately reorganized for the possible lack of personnel due to the COVID-19 positivity?	2	5	1.5	Faint Weakness	3	8	1.5	Strength	2	5	1.5	Faint Weakness	4	10	4.5	Strength	4	10	4.5	Strength	3	8	1.5	Strength	4	10	4.5	Strength
		67	In your opinion, have there been any changes in the internal atmosphere of your medical facility regarding the organizational well-being?	4	10	4.5	Strength	4	10	4.5	Strength	4	10	4.5	Strength	4	10	4.5	Strength	2	5	1.5	Faint Weakness	4	10	4.5	Strength	4	10	4.5	Strength
			Evaluate how much the following factors influenced the internal atmosphere when Spoleto Hospital was COVID-19 referrel center:
		68	The presence of a coordination team	1	3	3	Strong Weakness	0	1	5	Strong Weakness	2	5	1.5	Faint Weakness	0	1	5	Strong Weakness	3	8	1.5	Strength	1	3	3	Strong Weakness	2	5	1.5	Faint Weakness
		69	The closeness and support of colleagues	4	10	4.5	Strength	3	8	1.5	Strength	4	10	4.5	Strength	0	1	5	Strong Weakness	3	8	1.5	Strength	3	8	1.5	Strength	4	10	4.5	Strength
		70	The possibility of being able to rely on one's contacts both as individuals and as a working group	1	3	3	Strong Weakness	2	5	1.5	Faint Weakness	3	8	1.5	Strength	3	8	1.5	Strength	3	8	1.5	Strength	2	5	1.5	Faint Weakness	3	8	1.5	Strength
		71	Sharing the most difficult moments even with new colleagues	2	5	1.5	Faint Weakness	3	8	1.5	Strength	3	8	1.5	Strength	3	8	1.5	Strength	3	8	1.5	Strength	0	1	5	Strong Weakness	4	10	4.5	Strength
		72	The collaborative atmosphere and willingness to listen of the working group	3	8	1.5	Strength	2	5	1.5	Faint Weakness	3	8	1.5	Strength	3	8	1.5	Strength	3	8	1.5	Strength	0	1	5	Strong Weakness	4	10	4.5	Strength
		73	The inclusion of telemedicine in diagnosis and monitoring	0	1	5	Strong Weakness	3	8	1.5	Strength	2	5	1.5	Faint Weakness	3	8	1.5	Strength	3	8	1.5	Strength	0	1	5	Strong Weakness	2	5	1.5	Faint Weakness
			SECTION 9 MEAN SCORE	2.5	6	1	Faint Weakness	2.8	7	0.5	Faint Weakness	3	8	1.5	Strength	2.8	7	0.5	Faint Weakness	3.1	8	1.5	Strength	2.1	5	1.5	Faint Weakness	3.5	9	3	Strength
10	Analysis of factors external to organization		Evaluate how much the following external factors influenced the objective achievement of the Hospital:
		74	Human resources implementations	2	5	1.5	Faint Weakness	2	5	1.5	Faint Weakness	2	5	1.5	Faint Weakness	2	5	1.5	Faint Weakness	2	5	1.5	Faint Weakness	2	5	1.5	Faint Weakness	4	10	4.5	Strength
		75	Greater collaboration between local medical centers and the Hospital	2	5	1.5	Faint Weakness	2	5	1.5	Faint Weakness	2	5	1.5	Faint Weakness	4	10	4.5	Strength	3	8	1.5	Strength	2	5	1.5	Faint Weakness	2	5	1.5	Faint Weakness
		76	Effectiveness of mass vaccination	3	8	1.5	Strength	4	10	4.5	Strength	4	10	4.5	Strength	4	10	4.5	Strength	4	10	4.5	Strength	3	8	1.5	Strength	4	10	4.5	Strength
		77	Persistence of the COVID-19 pandemic	4	10	4.5	Strength	4	10	4.5	Strength	4	10	4.5	Strength	2	5	1.5	Faint Weakness	4	10	4.5	Strength	4	10	4.5	Strength	2	5	1.5	Faint Weakness
		78	Lack of willingness to change of the "senior" staff	3	8	1.5	Strength	0	1	5	Strong Weakness	2	5	1.5	Faint Weakness	1	3	3	Strong Weakness	3	8	1.5	Strength	2	5	1.5	Faint Weakness	2	5	1.5	Faint Weakness
		79	Possible redistribution of medical procedures based on their complexity between hospitals in Umbria	2	5	1.5	Faint Weakness	3	8	1.5	Strength	3	8	1.5	Strength	0	1	5	Strong Weakness	3	8	1.5	Strength	2	5	1.5	Faint Weakness	2	5	1.5	Faint Weakness
		80	Recruitment of non-trained personnel	4	10	4.5	Strength	4	10	4.5	Strength	2	5	1.5	Faint Weakness	4	10	4.5	Strength	3	8	1.5	Strength	2	5	1.5	Faint Weakness	3	8	1.5	Strength
		81	Lack of public funds	4	10	4.5	Strength	2	5	1.5	Faint Weakness	4	10	4.5	Strength	2	5	1.5	Faint Weakness	3	8	1.5	Strength	3	8	1.5	Strength	2	5	1.5	Faint Weakness
			SECTION 10 MEAN SCORE	3	8	1.5	Strength	2.625	7	0.5	Faint Weakness	2.875	7	0.5	Faint Weakness	2.375	6	1	Faint Weakness	3.125	8	1.5	Strength	2.5	6	1	Faint Weakness	2.625	7	0.5	Faint Weakness
			ALL SECTIONS MEAN SCORE	2.77	7	0.5	Faint Weakness	3.0525	8	1.5	Strength	2.4975	6	1	Faint Weakness	2.3875	6	1	Faint Weakness	2.6875	7	0.5	Faint Weakness	2.28724	6	1	Faint Weakness	4.28917	10	4.5	Strength
