# Supplementary material for: The Italian public health response during the pandemic emergency: from qualitative data to the “performance index” of care provided by Spoleto Hospital
Source: Front Public Health. 2025 Jun 16;13:1337375. doi: 10.3389/fpubh.2025.1337375 (PMC12206721; doi:10.3389/fpubh.2025.1337375)
Supplement: Supplementary file 6 [file Table_2.xlsx]

## Sheet: Supplementary Table 2
Supplementary Table 2 - Results related to items for each OU of OA2, based on the conversion scale.
			OA/OU	Diagnosis and Care Services
				Pathological Anatomy				Anesthesiology				Angiology				Cardiology				Dietetics				Gastrointestinal Endoscopy				Hepatology				Analysis Laboratory				Nephrology and Dialysis				Neurophysiopathology				Radiology				Radiotherapy
# SECTION	SECTION	# ITEM	ITEM (query)	Mean	Classification scale	Priority Score	Category	Mean	Classification scale	Priority Score	Category	Mean	Classification scale	Priority Score	Category	Mean	Classification scale	Priority Score	Category	Mean	Classification scale	Priority Score	Category	Mean	Classification scale	Priority Score	Category	Mean	Classification scale	Priority Score	Category	Mean	Classification scale	Priority Score	Category	Mean	Classification scale	Priority Score	Category	Mean	Classification scale	Priority Score	Category	Mean	Classification scale	Priority Score	Category	Mean	Classification scale
1	Context Analysis		Did the amount of medical procedures increase?
		1	During the first wave	3	8	1.5	Strength	2	5	1.5	Faint Weakness	1	3	3	Strong Weakness	3	8	1.5	Strength	2	5	1.5	Faint Weakness	1	3	3	Strong Weakness	2	5	1.5	Faint Weakness	3	8	1.5	Strength	3	8	1.5	Strength	0	1	5	Strong Weakness	1	3	3	Strong Weakness	1	3
		2	During the second wave	3	8	1.5	Strength	2	5	1.5	Faint Weakness	1	3	3	Strong Weakness	0	1	5	Strong Weakness	2	5	1.5	Faint Weakness	1	3	3	Strong Weakness	2	5	1.5	Faint Weakness	4	10	4.5	Strength	4	10	4.5	Strength	0	1	5	Strong Weakness	1	3	3	Strong Weakness	1	3
		3	During the third wave	3	8	1.5	Strength	1	3	3	Strong Weakness	3	8	1.5	Strength	2	5	1.5	Faint Weakness	4	10	4.5	Strength	1	3	3	Strong Weakness	2	5	1.5	Faint Weakness	4	10	4.5	Strength	3	8	1.5	Strength	0	1	5	Strong Weakness	1	3	3	Strong Weakness	1	3
		4	During the fourth wave	4	10	4.5	Strength	0	1	5	Strong Weakness	4	10	4.5	Strength	3	8	1.5	Strength	3	8	1.5	Strength	1	3	3	Strong Weakness	2	5	1.5	Faint Weakness	3	8	1.5	Strength	4	10	4.5	Strength	0	1	5	Strong Weakness	1	3	3	Strong Weakness	1	3
		5	During the fifth wave	4	10	4.5	Strength	1	3	3	Strong Weakness	4	10	4.5	Strength	2	5	1.5	Faint Weakness	4	10	4.5	Strength	1	3	3	Strong Weakness	2	5	1.5	Faint Weakness	3	8	1.5	Strength	3	8	1.5	Strength	0	1	5	Strong Weakness	1	3	3	Strong Weakness	1	3
			SECTION 1 MEAN SCORE	3.4	9	3	Strength	9	10	4.5	Strength	3	8	1.5	Strength	2	5	1.5	Faint Weakness	3	8	1.5	Strength	1	3	3	Strong Weakness	2	5	1.5	Faint Weakness	3.4	9	3	Strength	3.4	9	3	Strength	0	1	5	Strong Weakness	1	3	3	Strong Weakness	1	3
2	Patient Access to the hospital		Were safety protocols adopted?
		6	During the first wave	4	10	4.5	Strength	3	8	1.5	Strength	4	10	4.5	Strength	2	5	1.5	Faint Weakness	4	10	4.5	Strength	4	10	4.5	Strength	4	10	4.5	Strength	4	10	4.5	Strength	4	10	4.5	Strength	0	1	5	Strong Weakness	4	10	4.5	Strength	4	10
		7	During the second wave	4	10	4.5	Strength	4	10	4.5	Strength	4	10	4.5	Strength	4	10	4.5	Strength	4	10	4.5	Strength	4	10	4.5	Strength	4	10	4.5	Strength	4	10	4.5	Strength	4	10	4.5	Strength	0	1	5	Strong Weakness	4	10	4.5	Strength	4	10
		8	During the third wave	4	10	4.5	Strength	4	10	4.5	Strength	4	10	4.5	Strength	4	10	4.5	Strength	4	10	4.5	Strength	4	10	4.5	Strength	4	10	4.5	Strength	4	10	4.5	Strength	4	10	4.5	Strength	0	1	5	Strong Weakness	4	10	4.5	Strength	4	10
		9	During the fourth wave	4	10	4.5	Strength	4	10	4.5	Strength	4	10	4.5	Strength	4	10	4.5	Strength	4	10	4.5	Strength	4	10	4.5	Strength	4	10	4.5	Strength	3	8	1.5	Strength	4	10	4.5	Strength	0	1	5	Strong Weakness	4	10	4.5	Strength	4	10
		10	During the fifth wave	4	10	4.5	Strength	4	10	4.5	Strength	4	10	4.5	Strength	4	10	4.5	Strength	4	10	4.5	Strength	4	10	4.5	Strength	4	10	4.5	Strength	3	8	1.5	Strength	4	10	4.5	Strength	0	1	5	Strong Weakness	4	10	4.5	Strength	4	10
			Were social distancing measures taken?
		11	During the first wave	4	10	4.5	Strength	3	8	1.5	Strength	4	10	4.5	Strength	1	3	3	Strong Weakness	4	10	4.5	Strength	4	10	4.5	Strength	3	8	1.5	Strength	3	8	1.5	Strength	4	10	4.5	Strength	0	1	5	Strong Weakness	4	10	4.5	Strength	4	10
		12	During the second wave	4	10	4.5	Strength	4	10	4.5	Strength	4	10	4.5	Strength	4	10	4.5	Strength	4	10	4.5	Strength	4	10	4.5	Strength	3	8	1.5	Strength	4	10	4.5	Strength	4	10	4.5	Strength	0	1	5	Strong Weakness	4	10	4.5	Strength	4	10
		13	During the third wave	4	10	4.5	Strength	4	10	4.5	Strength	4	10	4.5	Strength	4	10	4.5	Strength	4	10	4.5	Strength	4	10	4.5	Strength	3	8	1.5	Strength	4	10	4.5	Strength	4	10	4.5	Strength	0	1	5	Strong Weakness	4	10	4.5	Strength	4	10
		14	During the fourth wave	4	10	4.5	Strength	4	10	4.5	Strength	4	10	4.5	Strength	4	10	4.5	Strength	4	10	4.5	Strength	4	10	4.5	Strength	3	8	1.5	Strength	3	8	1.5	Strength	3	8	1.5	Strength	0	1	5	Strong Weakness	4	10	4.5	Strength	4	10
		15	During the fifth wave	4	10	4.5	Strength	4	10	4.5	Strength	4	10	4.5	Strength	4	10	4.5	Strength	4	10	4.5	Strength	4	10	4.5	Strength	3	8	1.5	Strength	3	8	1.5	Strength	2	5	1.5	Faint Weakness	0	1	5	Strong Weakness	4	10	4.5	Strength	4	10
			SECTION 2 MEAN SCORE	4	10	4.5	Strength	3.8	10	4.5	Strength	4	10	4.5	Strength	3.5	9	3	Strength	4	10	4.5	Strength	4	10	4.5	Strength	3.5	9	3	Strength	3.5	9	3	Strength	3.7	10	4.5	Strength	0	1	5	Strong Weakness	4	10	4.5	Strength	4	10
3	Impact on taking charge of NON-COVID-19 patients		During the first two waves, considered as the most critical for adjustment, related to NON-COVID-19 patients:
		16	Have canceled visits been rescheduled and retrieved?	0	1	5	Strong Weakness	2	5	1.5	Faint Weakness	4	10	4.5	Strength	3	8	1.5	Strength	4	10	4.5	Strength	3	8	1.5	Strength	4	10	4.5	Strength	4	10	4.5	Strength	4	10	4.5	Strength	0	1	5	Strong Weakness	4	10	4.5	Strength	4	10
		17	Have remote clinical services been activated for patients who cannot interrupt their treatment (telemedicine)?	0	1	5	Strong Weakness	0	1	5	Strong Weakness	4	10	4.5	Strength	1	3	3	Strong Weakness	1	3	3	Strong Weakness	3	8	1.5	Strength	4	10	4.5	Strength	3	8	1.5	Strength	4	10	4.5	Strength	0	1	5	Strong Weakness	4	10	4.5	Strength	4	10
			SECTION 3 MEAN SCORE	0	1	5	Strong Weakness	1	3	3	Strong Weakness	4	10	4.5	Strength	2	5	1.5	Faint Weakness	2.5	6	1	Faint Weakness	3	8	1.5	Strength	4	10	4.5	Strength	3.5	9	3	Strength	4	10	4.5	Strength	0	1	5	Strong Weakness	4	10	4.5	Strength	4	10
4	Impact on taking charge of COVID-19 patients		Did you treat COVID-19 patients?
		18	During the first wave	4	10	4.5	Strength	1	3	3	Strong Weakness	4	10	4.5	Strength	1	3	3	Strong Weakness	4	10	4.5	Strength	4	10	4.5	Strength	2	5	1.5	Faint Weakness	4	10	4.5	Strength	4	10	4.5	Strength	0	1	5	Strong Weakness	4	10	4.5	Strength	1	3
		19	During the second wave	4	10	4.5	Strength	4	10	4.5	Strength	4	10	4.5	Strength	2	5	1.5	Faint Weakness	4	10	4.5	Strength	4	10	4.5	Strength	2	5	1.5	Faint Weakness	4	10	4.5	Strength	4	10	4.5	Strength	0	1	5	Strong Weakness	4	10	4.5	Strength	1	3
		20	During the third wave	4	10	4.5	Strength	4	10	4.5	Strength	4	10	4.5	Strength	1	3	3	Strong Weakness	3	8	1.5	Strength	4	10	4.5	Strength	2	5	1.5	Faint Weakness	4	10	4.5	Strength	4	10	4.5	Strength	0	1	5	Strong Weakness	4	10	4.5	Strength	1	3
		21	During the fourth wave	4	10	4.5	Strength	4	10	4.5	Strength	4	10	4.5	Strength	1	3	3	Strong Weakness	1	3	3	Strong Weakness	4	10	4.5	Strength	2	5	1.5	Faint Weakness	4	10	4.5	Strength	4	10	4.5	Strength	0	1	5	Strong Weakness	4	10	4.5	Strength	1	3
		22	During the fifth wave	4	10	4.5	Strength	1	3	3	Strong Weakness	4	10	4.5	Strength	1	3	3	Strong Weakness	1	3	3	Strong Weakness	4	10	4.5	Strength	2	5	1.5	Faint Weakness	4	10	4.5	Strength	4	10	4.5	Strength	0	1	5	Strong Weakness	4	10	4.5	Strength	1	3
			Have clinical pathways for COVID-19 and NON-COVID-19 patients been separated?
		23	During the first wave	4	10	4.5	Strength	3	8	1.5	Strength	4	10	4.5	Strength	0	1	5	Strong Weakness	4	10	4.5	Strength	4	10	4.5	Strength	3	8	1.5	Strength	0	1	5	Strong Weakness	4	10	4.5	Strength	0	1	5	Strong Weakness	4	10	4.5	Strength	4	10
		24	During the second wave	4	10	4.5	Strength	4	10	4.5	Strength	4	10	4.5	Strength	4	10	4.5	Strength	4	10	4.5	Strength	4	10	4.5	Strength	3	8	1.5	Strength	0	1	5	Strong Weakness	4	10	4.5	Strength	0	1	5	Strong Weakness	4	10	4.5	Strength	4	10
		25	During the third wave	4	10	4.5	Strength	4	10	4.5	Strength	4	10	4.5	Strength	4	10	4.5	Strength	4	10	4.5	Strength	4	10	4.5	Strength	3	8	1.5	Strength	0	1	5	Strong Weakness	4	10	4.5	Strength	0	1	5	Strong Weakness	4	10	4.5	Strength	4	10
		26	During the fourth wave	4	10	4.5	Strength	4	10	4.5	Strength	4	10	4.5	Strength	4	10	4.5	Strength	4	10	4.5	Strength	4	10	4.5	Strength	3	8	1.5	Strength	0	1	5	Strong Weakness	4	10	4.5	Strength	0	1	5	Strong Weakness	4	10	4.5	Strength	4	10
		27	During the fifth wave	4	10	4.5	Strength	4	10	4.5	Strength	4	10	4.5	Strength	4	10	4.5	Strength	4	10	4.5	Strength	4	10	4.5	Strength	3	8	1.5	Strength	0	1	5	Strong Weakness	4	10	4.5	Strength	0	1	5	Strong Weakness	4	10	4.5	Strength	4	10
			SECTION 4 MEAN SCORE	4	10	4.5	Strength	3.3	8	1.5	Strength	4	10	4.5	Strength	2.2	5	1.5	Faint Weakness	3.3	8	1.5	Strength	4	10	4.5	Strength	2.5	6	1	Faint Weakness	2	5	1.5	Faint Weakness	4	10	4.5	Strength	0	1	5	Strong Weakness	4	10	4.5	Strength	2.5	6
5	Impact on patient management		Was the continuity of care ensured for NON-COVID-19 patients?
		28	During the first wave	4	10	4.5	Strength	3	8	1.5	Strength	3	8	1.5	Strength	4	10	4.5	Strength	2	5	1.5	Faint Weakness	4	10	4.5	Strength	4	10	4.5	Strength	4	10	4.5	Strength	4	10	4.5	Strength	0	1	5	Strong Weakness	4	10	4.5	Strength	4	10
		29	During the second wave	4	10	4.5	Strength	4	10	4.5	Strength	3	8	1.5	Strength	4	10	4.5	Strength	3	8	1.5	Strength	4	10	4.5	Strength	3	8	1.5	Strength	4	10	4.5	Strength	4	10	4.5	Strength	0	1	5	Strong Weakness	4	10	4.5	Strength	4	10
		30	During the third wave	4	10	4.5	Strength	0	1	5	Strong Weakness	4	10	4.5	Strength	4	10	4.5	Strength	4	10	4.5	Strength	4	10	4.5	Strength	3	8	1.5	Strength	4	10	4.5	Strength	4	10	4.5	Strength	0	1	5	Strong Weakness	4	10	4.5	Strength	4	10
		31	During the fourth wave	4	10	4.5	Strength	0	1	5	Strong Weakness	4	10	4.5	Strength	4	10	4.5	Strength	4	10	4.5	Strength	4	10	4.5	Strength	4	10	4.5	Strength	4	10	4.5	Strength	4	10	4.5	Strength	0	1	5	Strong Weakness	4	10	4.5	Strength	4	10
		32	During the fifth wave	4	10	4.5	Strength	4	10	4.5	Strength	4	10	4.5	Strength	4	10	4.5	Strength	4	10	4.5	Strength	4	10	4.5	Strength	4	10	4.5	Strength	4	10	4.5	Strength	4	10	4.5	Strength	0	1	5	Strong Weakness	4	10	4.5	Strength	4	10
			Was the continuity of care ensured for COVID-19 patients?
		33	During the first wave	4	10	4.5	Strength	1	3	3	Strong Weakness	4	10	4.5	Strength	1	3	3	Strong Weakness	4	10	4.5	Strength	2	5	1.5	Faint Weakness	3	8	1.5	Strength	4	10	4.5	Strength	4	10	4.5	Strength	0	1	5	Strong Weakness	4	10	4.5	Strength	0	1
		34	During the second wave	4	10	4.5	Strength	3	8	1.5	Strength	4	10	4.5	Strength	4	10	4.5	Strength	4	10	4.5	Strength	2	5	1.5	Faint Weakness	3	8	1.5	Strength	4	10	4.5	Strength	4	10	4.5	Strength	0	1	5	Strong Weakness	4	10	4.5	Strength	0	1
		35	During the third wave	4	10	4.5	Strength	4	10	4.5	Strength	4	10	4.5	Strength	4	10	4.5	Strength	4	10	4.5	Strength	2	5	1.5	Faint Weakness	3	8	1.5	Strength	4	10	4.5	Strength	4	10	4.5	Strength	0	1	5	Strong Weakness	4	10	4.5	Strength	0	1
		36	During the fourth wave	4	10	4.5	Strength	4	10	4.5	Strength	4	10	4.5	Strength	4	10	4.5	Strength	4	10	4.5	Strength	2	5	1.5	Faint Weakness	3	8	1.5	Strength	4	10	4.5	Strength	4	10	4.5	Strength	0	1	5	Strong Weakness	4	10	4.5	Strength	0	1
		37	During the fifth wave	4	10	4.5	Strength	3	8	1.5	Strength	4	10	4.5	Strength	4	10	4.5	Strength	4	10	4.5	Strength	2	5	1.5	Faint Weakness	3	8	1.5	Strength	4	10	4.5	Strength	4	10	4.5	Strength	0	1	5	Strong Weakness	4	10	4.5	Strength	0	1
			SECTION 5 MEAN SCORE	4	10	4.5	Strength	2.6	6	1	Faint Weakness	3.8	10	4.5	Strength	3.7	10	4.5	Strength	3.7	10	4.5	Strength	3	8	1.5	Strength	3.3	8	1.5	Strength	4	10	4.5	Strength	4	10	4.5	Strength	0	1	5	Strong Weakness	4	10	4.5	Strength	2	5
6	Experience as COVID-19 referral center		During the second wave, Spoleto Hospital became COVID-19 referrel center:
		38	In your opinion, was it the most complex pandemic phase?	0	1	5	Strong Weakness	4	10	4.5	Strength	4	10	4.5	Strength	3	8	1.5	Strength	4	10	4.5	Strength	4	10	4.5	Strength	4	10	4.5	Strength	4	10	4.5	Strength	1	3	3	Strong Weakness	0	1	5	Strong Weakness	4	10	4.5	Strength	4	10
		39	Were all medical procedures guaranteed despite the closure of some clinical wards?	4	10	4.5	Strength	1	3	3	Strong Weakness	4	10	4.5	Strength	2	5	1.5	Faint Weakness	1	3	3	Strong Weakness	2	5	1.5	Faint Weakness	3	8	1.5	Strength	2	5	1.5	Faint Weakness	4	10	4.5	Strength	0	1	5	Strong Weakness	3	8	1.5	Strength	2	5
		40	Did the closure of some clinical wards create inconvenience to users?	4	10	4.5	Strength	4	10	4.5	Strength	3	8	1.5	Strength	4	10	4.5	Strength	4	10	4.5	Strength	4	10	4.5	Strength	3	8	1.5	Strength	3	8	1.5	Strength	1	3	3	Strong Weakness	0	1	5	Strong Weakness	4	10	4.5	Strength	2	5
		41	Has the timing been respected in the passage of the patient from one care setting to another within the Hospital?	0	1	5	Strong Weakness	4	10	4.5	Strength	4	10	4.5	Strength	4	10	4.5	Strength	2	5	1.5	Faint Weakness	4	10	4.5	Strength	3	8	1.5	Strength	3	8	1.5	Strength	1	3	3	Strong Weakness	0	1	5	Strong Weakness	0	1	5	Strong Weakness	3	8
		42	Were multidisciplinary discussions on the health status of patients carried out?	0	1	5	Strong Weakness	4	10	4.5	Strength	4	10	4.5	Strength	4	10	4.5	Strength	2	5	1.5	Faint Weakness	2	5	1.5	Faint Weakness	2	5	1.5	Faint Weakness	4	10	4.5	Strength	4	10	4.5	Strength	0	1	5	Strong Weakness	0	1	5	Strong Weakness	3	8
		43	Have structural and organizational changes been made in your medical facility?	2	5	1.5	Faint Weakness	4	10	4.5	Strength	4	10	4.5	Strength	4	10	4.5	Strength	4	10	4.5	Strength	4	10	4.5	Strength	2	5	1.5	Faint Weakness	4	10	4.5	Strength	4	10	4.5	Strength	0	1	5	Strong Weakness	4	10	4.5	Strength	4	10
			SECTION 6 MEAN SCORE	1.66667	4	2	Strong Weakness	3.5	9	3	Strength	3.83333	10	4.5	Strength	3.5	9	3	Strength	2.83333	7	0.5	Faint Weakness	3.33333	8	1.5	Strength	2.83333	7	0.5	Faint Weakness	3.33333	8	1.5	Strength	2.5	6	1	Faint Weakness	0	1	5	Strong Weakness	2.5	6	1	Faint Weakness	3	8
7	Procedures and recommendations for healthcare personnel/users		Was the proper use of PPE monitored in patients and their families?
		44	During the first wave	4	10	4.5	Strength	3	8	1.5	Strength	4	10	4.5	Strength	1	3	3	Strong Weakness	3	8	1.5	Strength	4	10	4.5	Strength	3	8	1.5	Strength	4	10	4.5	Strength	4	10	4.5	Strength	0	1	5	Strong Weakness	4	10	4.5	Strength	4	10
		45	During the second wave	4	10	4.5	Strength	4	10	4.5	Strength	4	10	4.5	Strength	4	10	4.5	Strength	4	10	4.5	Strength	4	10	4.5	Strength	4	10	4.5	Strength	4	10	4.5	Strength	4	10	4.5	Strength	0	1	5	Strong Weakness	4	10	4.5	Strength	4	10
		46	During the third wave	4	10	4.5	Strength	4	10	4.5	Strength	4	10	4.5	Strength	4	10	4.5	Strength	4	10	4.5	Strength	4	10	4.5	Strength	4	10	4.5	Strength	4	10	4.5	Strength	4	10	4.5	Strength	0	1	5	Strong Weakness	4	10	4.5	Strength	4	10
		47	During the fourth wave	4	10	4.5	Strength	4	10	4.5	Strength	4	10	4.5	Strength	4	10	4.5	Strength	4	10	4.5	Strength	4	10	4.5	Strength	4	10	4.5	Strength	4	10	4.5	Strength	3	8	1.5	Strength	0	1	5	Strong Weakness	4	10	4.5	Strength	4	10
		48	During the fifth wave	4	10	4.5	Strength	4	10	4.5	Strength	4	10	4.5	Strength	3	8	1.5	Strength	4	10	4.5	Strength	4	10	4.5	Strength	4	10	4.5	Strength	4	10	4.5	Strength	3	8	1.5	Strength	0	1	5	Strong Weakness	4	10	4.5	Strength	4	10
			Were the procedures/recommendations made clear and visible and respected?
		49	During the first wave	4	10	4.5	Strength	3	8	1.5	Strength	4	10	4.5	Strength	2	5	1.5	Faint Weakness	3	8	1.5	Strength	4	10	4.5	Strength	3	8	1.5	Strength	3	8	1.5	Strength	4	10	4.5	Strength	4	10	4.5	Strength	4	10	4.5	Strength	4	10
		50	During the second wave	4	10	4.5	Strength	4	10	4.5	Strength	4	10	4.5	Strength	4	10	4.5	Strength	4	10	4.5	Strength	4	10	4.5	Strength	3	8	1.5	Strength	3	8	1.5	Strength	4	10	4.5	Strength	4	10	4.5	Strength	4	10	4.5	Strength	4	10
		51	During the third wave	4	10	4.5	Strength	4	10	4.5	Strength	4	10	4.5	Strength	4	10	4.5	Strength	4	10	4.5	Strength	4	10	4.5	Strength	3	8	1.5	Strength	3	8	1.5	Strength	4	10	4.5	Strength	4	10	4.5	Strength	4	10	4.5	Strength	4	10
		52	During the fourth wave	4	10	4.5	Strength	4	10	4.5	Strength	4	10	4.5	Strength	4	10	4.5	Strength	4	10	4.5	Strength	4	10	4.5	Strength	3	8	1.5	Strength	3	8	1.5	Strength	4	10	4.5	Strength	4	10	4.5	Strength	4	10	4.5	Strength	4	10
		53	During the fifth wave	4	10	4.5	Strength	4	10	4.5	Strength	4	10	4.5	Strength	3	8	1.5	Strength	4	10	4.5	Strength	4	10	4.5	Strength	3	8	1.5	Strength	3	8	1.5	Strength	4	10	4.5	Strength	4	10	4.5	Strength	4	10	4.5	Strength	4	10
			SECTION 7 MEAN SCORE	4	10	4.5	Strength	3.8	10	4.5	Strength	4	10	4.5	Strength	3.3	8	1.5	Strength	3.8	10	4.5	Strength	4	10	4.5	Strength	3.4	9	3	Strength	3.5	9	3	Strength	3.8	10	4.5	Strength	2	5	1.5	Faint Weakness	4	10	4.5	Strength	4	10
8	Education-Information-Training: healthcare professionals’ management		Have healthcare workers been educated and trained on PPE dressing/dusting procedurs?
		54	During the first wave	4	10	4.5	Strength	3	8	1.5	Strength	3	8	1.5	Strength	2	5	1.5	Faint Weakness	2	5	1.5	Faint Weakness	4	10	4.5	Strength	4	10	4.5	Strength	4	10	4.5	Strength	4	10	4.5	Strength	3	8	1.5	Strength	4	10	4.5	Strength	4	10
		55	During the second wave	4	10	4.5	Strength	4	10	4.5	Strength	4	10	4.5	Strength	4	10	4.5	Strength	4	10	4.5	Strength	4	10	4.5	Strength	4	10	4.5	Strength	4	10	4.5	Strength	4	10	4.5	Strength	3	8	1.5	Strength	4	10	4.5	Strength	4	10
		56	During the third wave	4	10	4.5	Strength	4	10	4.5	Strength	4	10	4.5	Strength	4	10	4.5	Strength	4	10	4.5	Strength	4	10	4.5	Strength	4	10	4.5	Strength	4	10	4.5	Strength	4	10	4.5	Strength	1	3	3	Strong Weakness	4	10	4.5	Strength	4	10
		57	During the fourth wave	4	10	4.5	Strength	4	10	4.5	Strength	4	10	4.5	Strength	4	10	4.5	Strength	4	10	4.5	Strength	4	10	4.5	Strength	4	10	4.5	Strength	4	10	4.5	Strength	4	10	4.5	Strength	1	3	3	Strong Weakness	4	10	4.5	Strength	4	10
		58	During the fifth wave	4	10	4.5	Strength	4	10	4.5	Strength	4	10	4.5	Strength	4	10	4.5	Strength	4	10	4.5	Strength	4	10	4.5	Strength	4	10	4.5	Strength	4	10	4.5	Strength	4	10	4.5	Strength	1	3	3	Strong Weakness	4	10	4.5	Strength	4	10
			Was the staff equipped with different types of PPE in accordance with the professional exposure risk?
		59	During the first wave	4	10	4.5	Strength	3	8	1.5	Strength	3	8	1.5	Strength	1	3	3	Strong Weakness	3	8	1.5	Strength	3	8	1.5	Strength	4	10	4.5	Strength	4	10	4.5	Strength	4	10	4.5	Strength	0	1	5	Strong Weakness	4	10	4.5	Strength	4	10
		60	During the second wave	4	10	4.5	Strength	4	10	4.5	Strength	4	10	4.5	Strength	4	10	4.5	Strength	4	10	4.5	Strength	4	10	4.5	Strength	4	10	4.5	Strength	4	10	4.5	Strength	4	10	4.5	Strength	0	1	5	Strong Weakness	4	10	4.5	Strength	4	10
		61	During the third wave	4	10	4.5	Strength	4	10	4.5	Strength	4	10	4.5	Strength	4	10	4.5	Strength	4	10	4.5	Strength	4	10	4.5	Strength	4	10	4.5	Strength	4	10	4.5	Strength	4	10	4.5	Strength	0	1	5	Strong Weakness	4	10	4.5	Strength	4	10
		62	During the fourth wave	4	10	4.5	Strength	4	10	4.5	Strength	4	10	4.5	Strength	4	10	4.5	Strength	4	10	4.5	Strength	3	8	1.5	Strength	4	10	4.5	Strength	4	10	4.5	Strength	4	10	4.5	Strength	0	1	5	Strong Weakness	4	10	4.5	Strength	4	10
		63	During the fifth wave	4	10	4.5	Strength	4	10	4.5	Strength	4	10	4.5	Strength	4	10	4.5	Strength	4	10	4.5	Strength	3	8	1.5	Strength	4	10	4.5	Strength	4	10	4.5	Strength	4	10	4.5	Strength	0	1	5	Strong Weakness	4	10	4.5	Strength	4	10
			SECTION 8 MEAN SCORE	4	10	4.5	Strength	3.8	10	4.5	Strength	3.8	10	4.5	Strength	3.5	9	3	Strength	3.7	10	4.5	Strength	3.7	10	4.5	Strength	4	10	4.5	Strength	4	10	4.5	Strength	4	10	4.5	Strength	0.9	3	3	Strong Weakness	4	10	4.5	Strength	4	10
9	Analysis of factors internal to organization	64	When Spoleto Hospital became COVID-19 referrel center, were healthcare workers periodically tested for COVID-19 by nasopharyngeal swab?	4	10	4.5	Strength	4	10	4.5	Strength	4	10	4.5	Strength	4	10	4.5	Strength	4	10	4.5	Strength	4	10	4.5	Strength	4	10	4.5	Strength	4	10	4.5	Strength	4	10	4.5	Strength	0	1	5	Strong Weakness	4	10	4.5	Strength	4	10
		65	When Spoleto Hospital became COVID-19 referrel center, did the fear of contagion between staff/patients increase?	0	1	5	Strong Weakness	4	10	4.5	Strength	4	10	4.5	Strength	4	10	4.5	Strength	4	10	4.5	Strength	4	10	4.5	Strength	3	8	1.5	Strength	4	10	4.5	Strength	2	5	1.5	Faint Weakness	0	1	5	Strong Weakness	4	10	4.5	Strength	3	8
		66	Has the working time been adequately reorganized for the possible lack of personnel due to the COVID-19 positivity?	4	10	4.5	Strength	1	3	3	Strong Weakness	3	8	1.5	Strength	4	10	4.5	Strength	0	1	5	Strong Weakness	3	8	1.5	Strength	3	8	1.5	Strength	3	8	1.5	Strength	4	10	4.5	Strength	0	1	5	Strong Weakness	4	10	4.5	Strength	3	8
		67	In your opinion, have there been any changes in the internal atmosphere of your medical facility regarding the organizational well-being?	4	10	4.5	Strength	4	10	4.5	Strength	4	10	4.5	Strength	4	10	4.5	Strength	4	10	4.5	Strength	2	5	1.5	Faint Weakness	2	5	1.5	Faint Weakness	3	8	1.5	Strength	2	5	1.5	Faint Weakness	0	1	5	Strong Weakness	4	10	4.5	Strength	3	8
			Evaluate how much the following factors influenced the internal atmosphere when Spoleto Hospital was COVID-19 referrel center:
		68	The presence of a coordination team	0	1	5	Strong Weakness	0	1	5	Strong Weakness	4	10	4.5	Strength	4	10	4.5	Strength	3	8	1.5	Strength	3	8	1.5	Strength	3	8	1.5	Strength	3	8	1.5	Strength	2	5	1.5	Faint Weakness	0	1	5	Strong Weakness	4	10	4.5	Strength	3	8
		69	The closeness and support of colleagues	0	1	5	Strong Weakness	4	10	4.5	Strength	4	10	4.5	Strength	4	10	4.5	Strength	4	10	4.5	Strength	4	10	4.5	Strength	3	8	1.5	Strength	4	10	4.5	Strength	3	8	1.5	Strength	0	1	5	Strong Weakness	4	10	4.5	Strength	3	8
		70	The possibility of being able to rely on one's contacts both as individuals and as a working group	0	1	5	Strong Weakness	4	10	4.5	Strength	4	10	4.5	Strength	3	8	1.5	Strength	2	5	1.5	Faint Weakness	2	5	1.5	Faint Weakness	3	8	1.5	Strength	4	10	4.5	Strength	4	10	4.5	Strength	0	1	5	Strong Weakness	4	10	4.5	Strength	3	8
		71	Sharing the most difficult moments even with new colleagues	0	1	5	Strong Weakness	4	10	4.5	Strength	4	10	4.5	Strength	4	10	4.5	Strength	2	5	1.5	Faint Weakness	4	10	4.5	Strength	3	8	1.5	Strength	4	10	4.5	Strength	4	10	4.5	Strength	0	1	5	Strong Weakness	4	10	4.5	Strength	3	8
		72	The collaborative atmosphere and willingness to listen of the working group	0	1	5	Strong Weakness	4	10	4.5	Strength	4	10	4.5	Strength	4	10	4.5	Strength	2	5	1.5	Faint Weakness	3	8	1.5	Strength	3	8	1.5	Strength	3	8	1.5	Strength	4	10	4.5	Strength	0	1	5	Strong Weakness	4	10	4.5	Strength	3	8
		73	The inclusion of telemedicine in diagnosis and monitoring	0	1	5	Strong Weakness	4	10	4.5	Strength	4	10	4.5	Strength	3	8	1.5	Strength	0	1	5	Strong Weakness	3	8	1.5	Strength	3	8	1.5	Strength	3	8	1.5	Strength	4	10	4.5	Strength	0	1	5	Strong Weakness	4	10	4.5	Strength	3	8
			SECTION 9 MEAN SCORE	1.2	3	3	Strong Weakness	3.3	8	1.5	Strength	3.9	10	4.5	Strength	3.8	10	4.5	Strength	2.5	6	1	Faint Weakness	3.2	8	1.5	Strength	3	8	1.5	Strength	3.5	9	3	Strength	3.3	8	1.5	Strength	0	1	5	Strong Weakness	4	10	4.5	Strength	3.1	8
10	Analysis of factors external to organization		Evaluate how much the following external factors influenced the objective achievement of the Hospital:
		74	Human resources implementations	2	5	1.5	Faint Weakness	4	10	4.5	Strength	3	8	1.5	Strength	4	10	4.5	Strength	1	3	3	Strong Weakness	2	5	1.5	Faint Weakness	2	5	1.5	Faint Weakness	4	10	4.5	Strength	4	10	4.5	Strength	0	1	5	Strong Weakness	4	10	4.5	Strength	2	5
		75	Greater collaboration between local medical centers and the Hospital	2	5	1.5	Faint Weakness	0	1	5	Strong Weakness	3	8	1.5	Strength	3	8	1.5	Strength	1	3	3	Strong Weakness	3	8	1.5	Strength	3	8	1.5	Strength	4	10	4.5	Strength	0	1	5	Strong Weakness	0	1	5	Strong Weakness	0	1	5	Strong Weakness	2	5
		76	Effectiveness of mass vaccination	3	8	1.5	Strength	4	10	4.5	Strength	4	10	4.5	Strength	3	8	1.5	Strength	2	5	1.5	Faint Weakness	4	10	4.5	Strength	4	10	4.5	Strength	4	10	4.5	Strength	4	10	4.5	Strength	0	1	5	Strong Weakness	4	10	4.5	Strength	3	8
		77	Persistence of the COVID-19 pandemic	4	10	4.5	Strength	4	10	4.5	Strength	2	5	1.5	Faint Weakness	3	8	1.5	Strength	4	10	4.5	Strength	3	8	1.5	Strength	4	10	4.5	Strength	4	10	4.5	Strength	2	5	1.5	Faint Weakness	0	1	5	Strong Weakness	4	10	4.5	Strength	3	8
		78	Lack of willingness to change of the "senior" staff	2	5	1.5	Faint Weakness	2	5	1.5	Faint Weakness	2	5	1.5	Faint Weakness	2	5	1.5	Faint Weakness	1	3	3	Strong Weakness	2	5	1.5	Faint Weakness	3	8	1.5	Strength	3	8	1.5	Strength	2	5	1.5	Faint Weakness	0	1	5	Strong Weakness	0	1	5	Strong Weakness	1	3
		79	Possible redistribution of medical procedures based on their complexity between hospitals in Umbria	2	5	1.5	Faint Weakness	2	5	1.5	Faint Weakness	2	5	1.5	Faint Weakness	3	8	1.5	Strength	1	3	3	Strong Weakness	2	5	1.5	Faint Weakness	3	8	1.5	Strength	4	10	4.5	Strength	3	8	1.5	Strength	0	1	5	Strong Weakness	2	5	1.5	Faint Weakness	2	5
		80	Recruitment of non-trained personnel	2	5	1.5	Faint Weakness	4	10	4.5	Strength	3	8	1.5	Strength	3	8	1.5	Strength	3	8	1.5	Strength	3	8	1.5	Strength	3	8	1.5	Strength	3	8	1.5	Strength	3	8	1.5	Strength	0	1	5	Strong Weakness	0	1	5	Strong Weakness	3	8
		81	Lack of public funds	2	5	1.5	Faint Weakness	2	5	1.5	Faint Weakness	3	8	1.5	Strength	3	8	1.5	Strength	4	10	4.5	Strength	4	10	4.5	Strength	3	8	1.5	Strength	4	10	4.5	Strength	3	8	1.5	Strength	0	1	5	Strong Weakness	2	5	1.5	Faint Weakness	3	8
			SECTION 10 MEAN SCORE	2.375	6	1	Faint Weakness	2.75	7	0.5	Faint Weakness	2.75	7	0.5	Faint Weakness	3	8	1.5	Strength	2.125	5	1.5	Faint Weakness	2.875	7	0.5	Faint Weakness	3.125	8	1.5	Strength	3.75	10	4.5	Strength	2.625	7	0.5	Faint Weakness	0	1	5	Strong Weakness	2	5	1.5	Faint Weakness	2.375	6
			ALL SECTIONS MEAN SCORE	2.86417	7	0.5	Faint Weakness	3.685	10	4.5	Strength	3.70833	10	4.5	Strength	3.05	8	1.5	Strength	3.14583	8	1.5	Strength	3.21083	8	1.5	Strength	3.16583	8	1.5	Strength	3.44833	9	3	Strength	3.5325	9	3	Strength	0.29	1	5	Strong Weakness	3.35	9	3	Strength	2.9975	8
[truncated: 10 more columns]
